# Supplementary material for: Peptide-tags for enhanced DNA microarray performance
Source: Royal Society of Chemistry journal article supplement (doi:10.1039/c005491g), 2010-10-15
Supplement: c005491g.pdf [file c005491g.pdf]

## Supplementary material

Figures S1 – S4 show calibration plots obtained with differentially functionalized HCMV and HCV probes hybridized with Cy3-labeled complementary targets, respectively.

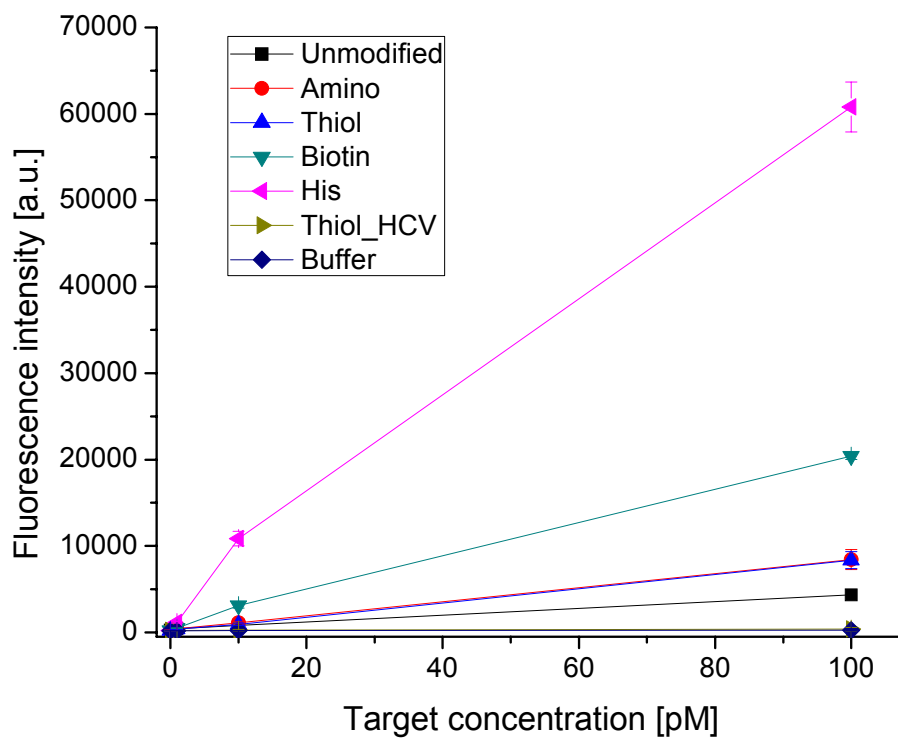

Figure S1: Mean fluorescence intensities of differentially functionalized HCMV and HCV probes spotted on epoxy silane slides hybridized with different Cy3-labeled HCMV target concentrations; n = 5.

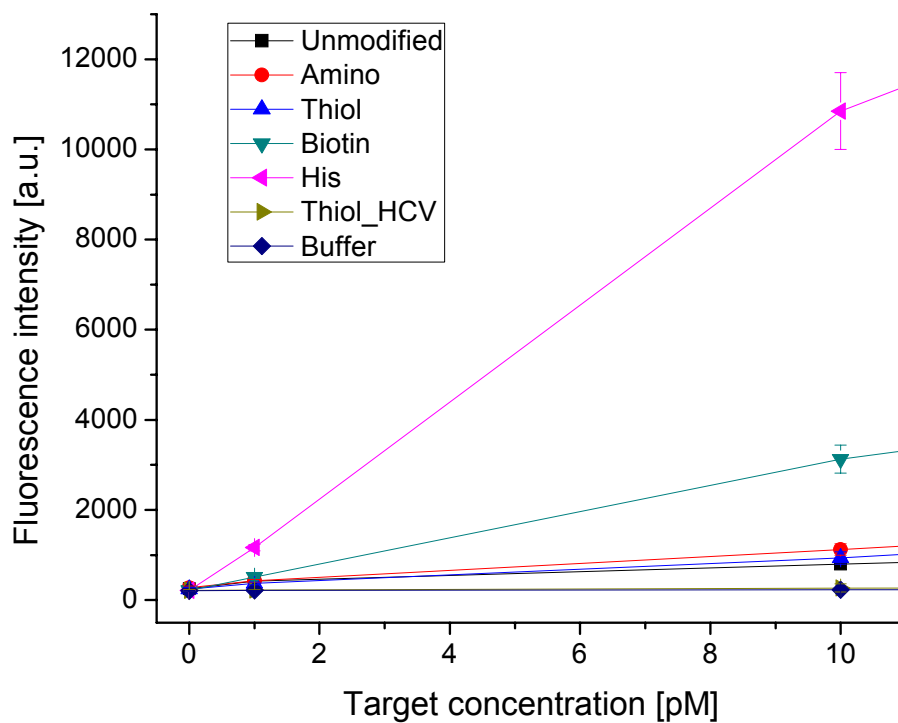

Figure S2: Mean fluorescence intensities of differentially functionalized HCMV and HCV probes spotted on epoxy silane slides hybridized with different Cy3-labeled HCMV target concentrations, showing target concentrations between 0 and 10 pM; n = 5.

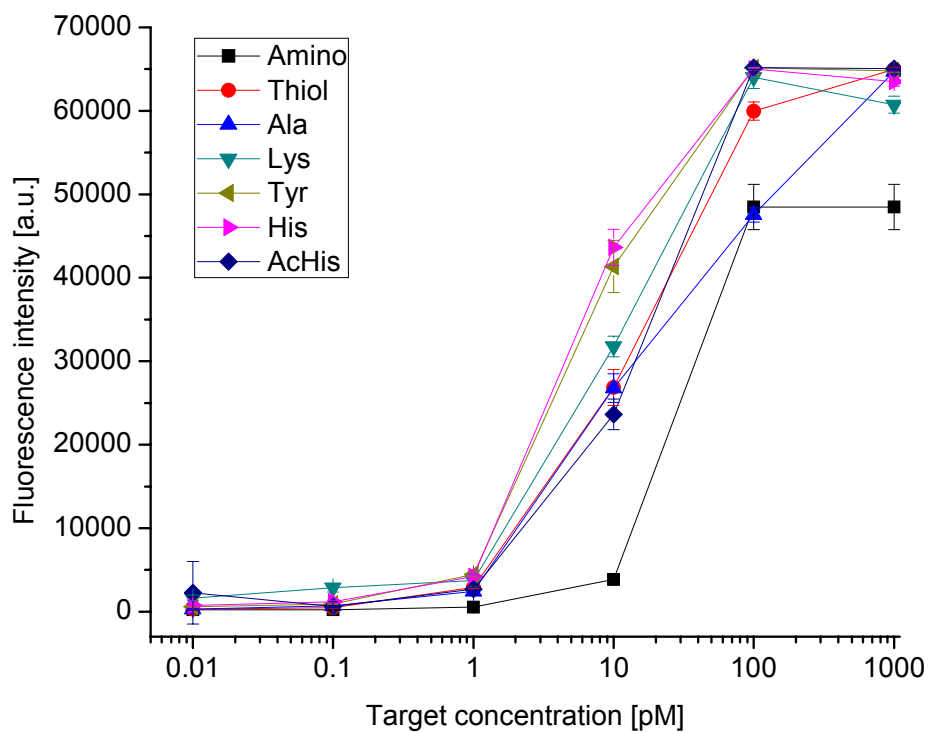

Figure S3: Mean fluorescence intensities of differentially functionalized HCV probes spotted on epoxy silane slides hybridized with different Cy3-labeled target concentrations; Ala = 6x alanine; Lys = 6x lysine; Tyr = 6x tyrosine; AcHis = 5 histine + terminal histidine with acetylated terminal amino group; His = 6x histidine. n = 5.

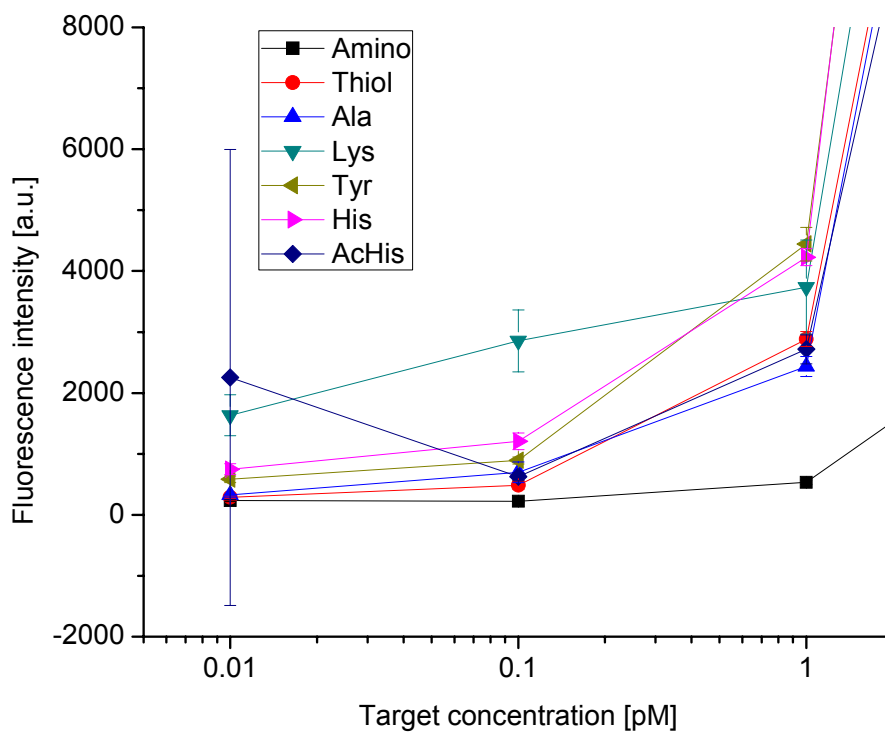

Figure S4: Mean fluorescence intensities of differentially functionalized HCV probes spotted on epoxy silane slides hybridized with different Cy3-labeled target concentrations, showing target concentrations between 10 fM and 1 pM; Ala = 6x alanine; Lys = 6x lysine; Tyr = 6x tyrosine; AcHis = 5 histine + terminal histidine with acetylated terminal amino group; His = 6x histidine. n = 5.
